# Supplementary material
Source: publisher figshare collection journal article supplement (https://acs.figshare.com/ndownloader/files/5199073)
Supplement: Supplementary file 1 [file 5199073]

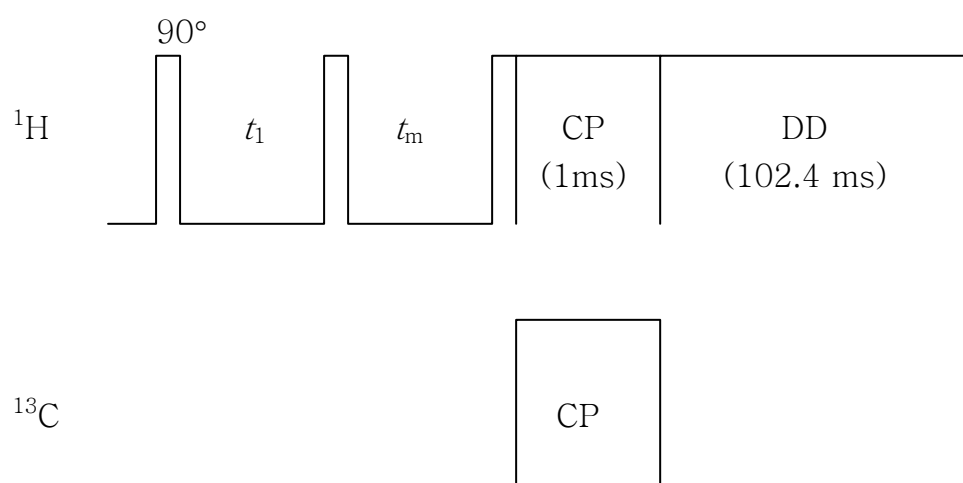

**Figure A.** Pulse sequence of 2D WISE NMR experiment. The cross polarization (CP) and  $^{13}\text{C}$  acquisition with dipolar decoupling of protons (DD) are used as basic 1D CP experiment.

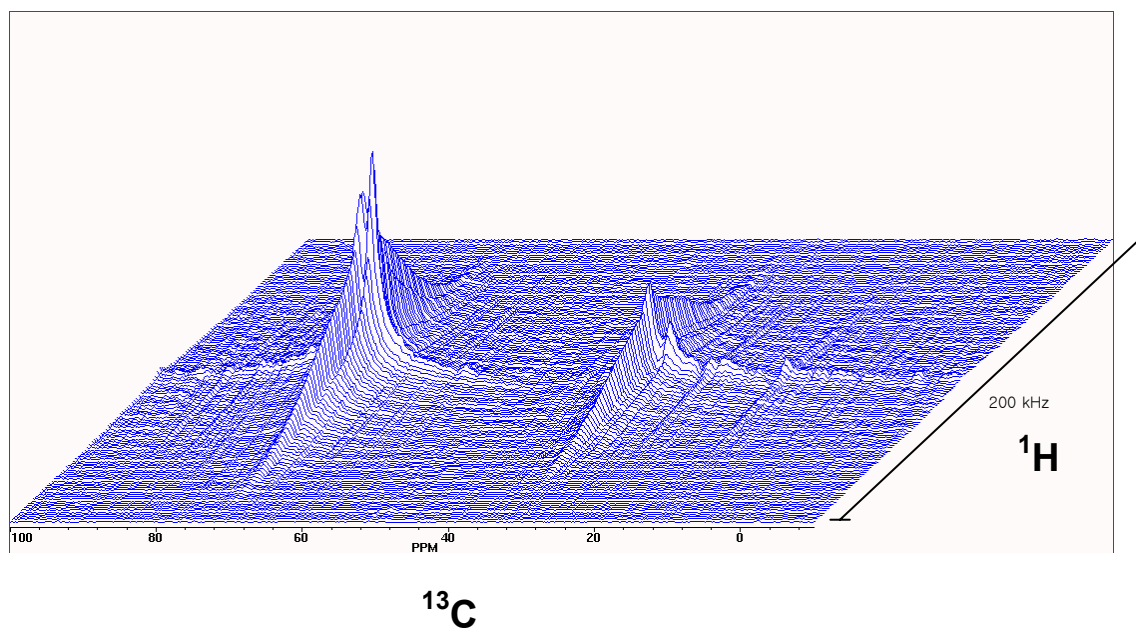

**Figure B.** 2D WISE NMR spectrum of HEUR 2(18) with the CP contact time of 1 ms.
